# Supplementary material for: Cyclin E1 and Rb modulation as common events at time of resistance to palbociclib in hormone receptor-positive breast cancer
Source: PubMed Central journal article supplement (PMC6261939; doi:10.1038/s41523-018-0092-4), 2018-11-28
Supplement: 41523_2018_92_MOESM1_ESM.pdf [file 41523_2018_92_MOESM1_ESM.pdf]

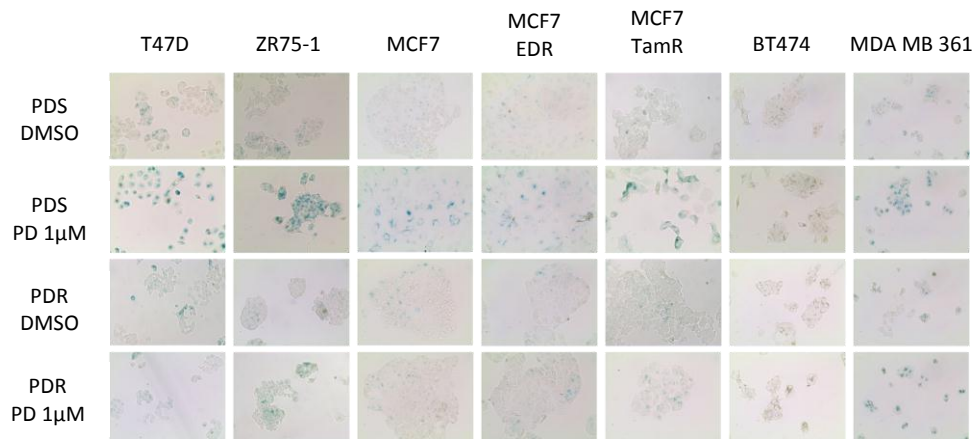

**Supplementary Figure s1.** Representative images of  $\beta$ -galactosidase senescence assay.

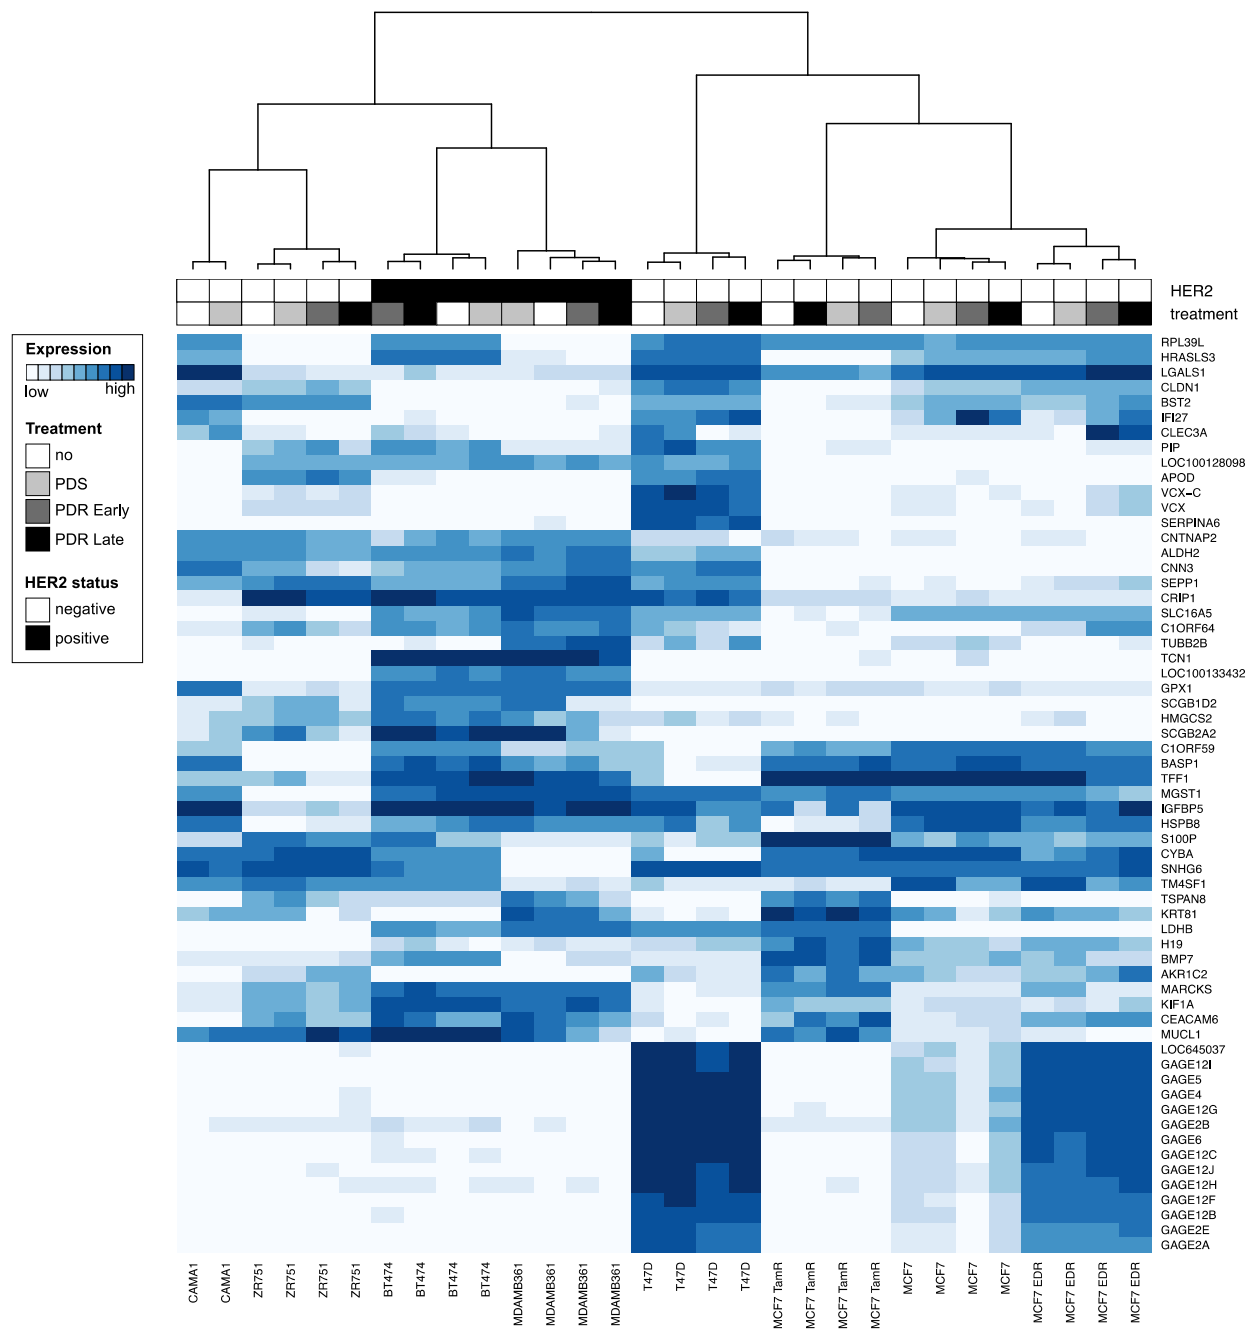

**Supplementary Figure s2.** Hierarchical clustering of PDS, PDS treated and PDR cell line models (n=30) using ‘1 – Pearson’s correlation’ as distance measure on the expression values of the top 2.5%o variable genes (n=61). Details about the different treatments and HER2 status are reported in the annotation track above the heat map.

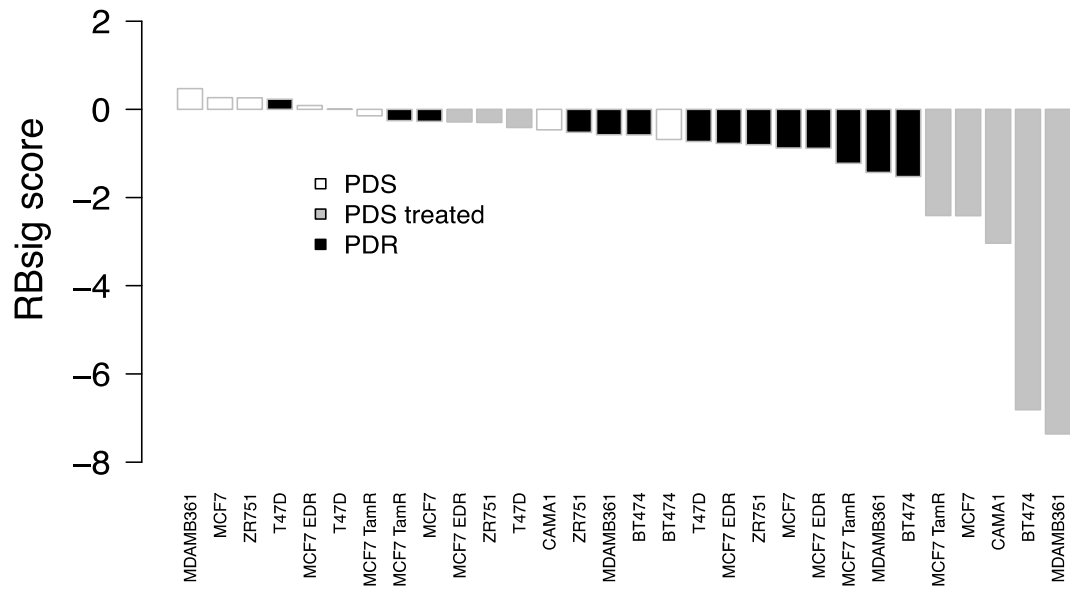

**Supplementary Figure s3.** Bar plot of RBsig score across PDS, PDS treated and PDR cell line models.

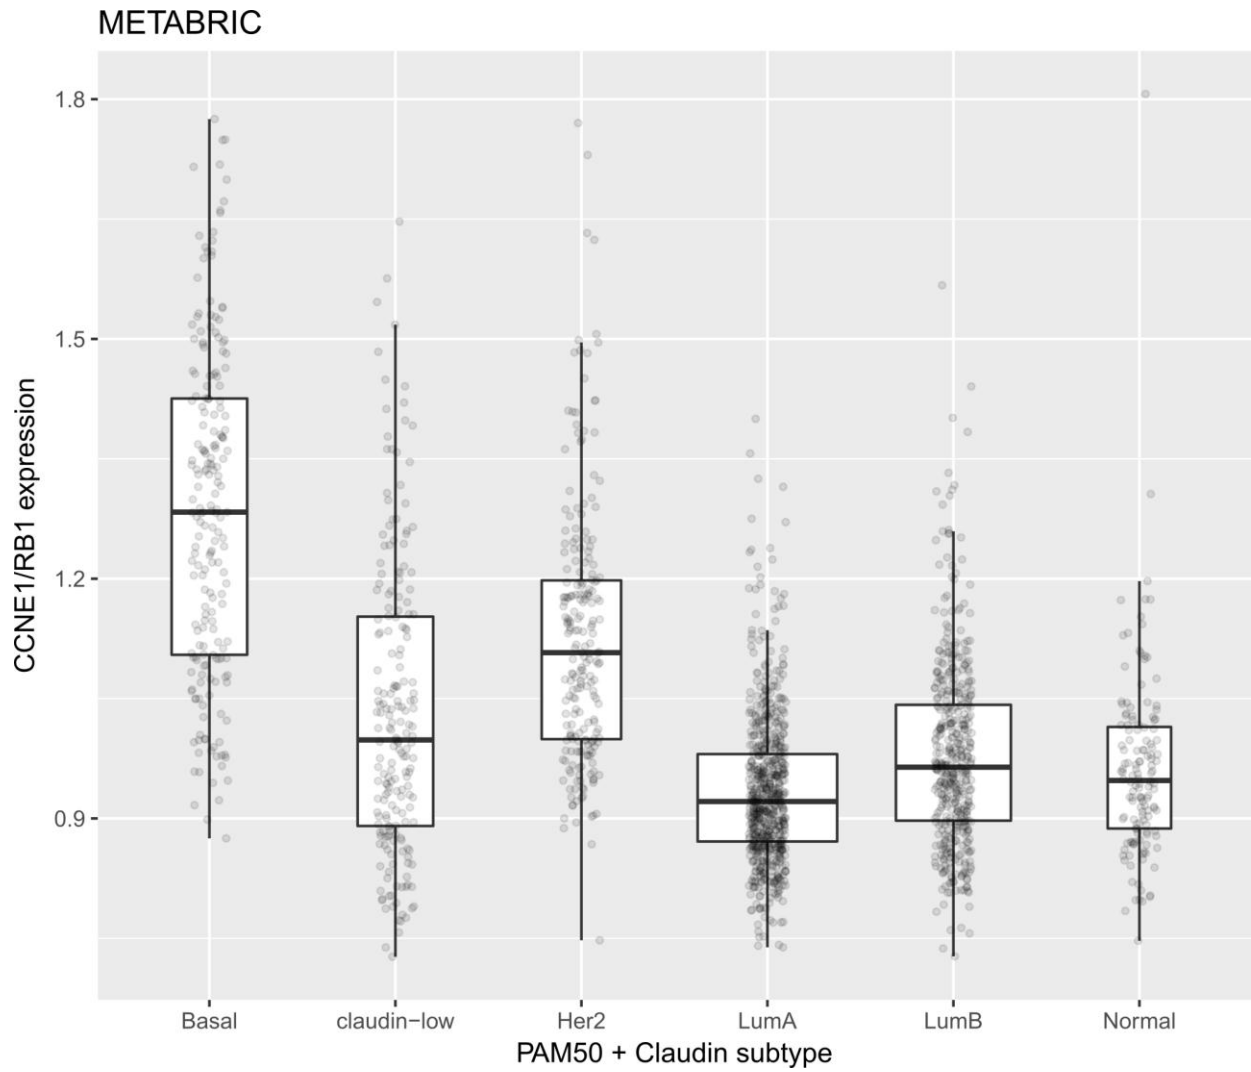

**Supplementary Figure s4.** Box plots of the distribution of the ratio between the expression values of *CCNE1* to *RB1* across the different PAM50 subtypes in the METABRIC dataset<sup>15</sup>.

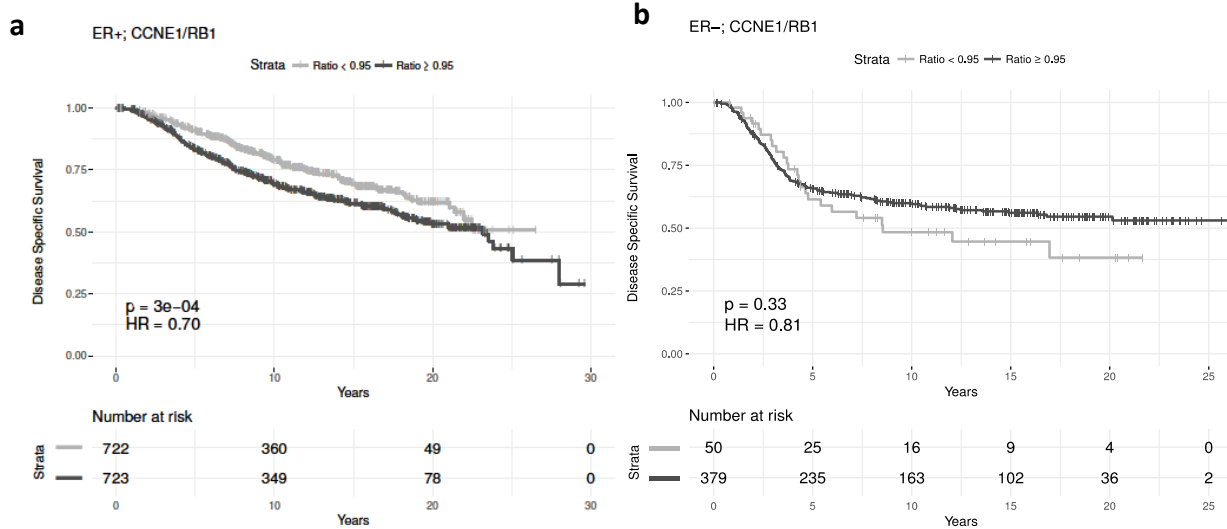

**Supplementary Figure s5.** a) Kaplan-Meier curves according to high (above the median, dark grey) or low (below the median, light grey) levels of *CCNE1/RB1* in the METABRIC dataset<sup>15</sup> (n=1904) for ER+ (n=1445) samples. b) Kaplan-Meier curves according to high (above the median, dark grey) or low (below the median, light grey) levels of *CCNE1/RB1* in the METABRIC dataset<sup>15</sup> (n=1904) for ER- samples (n=429).

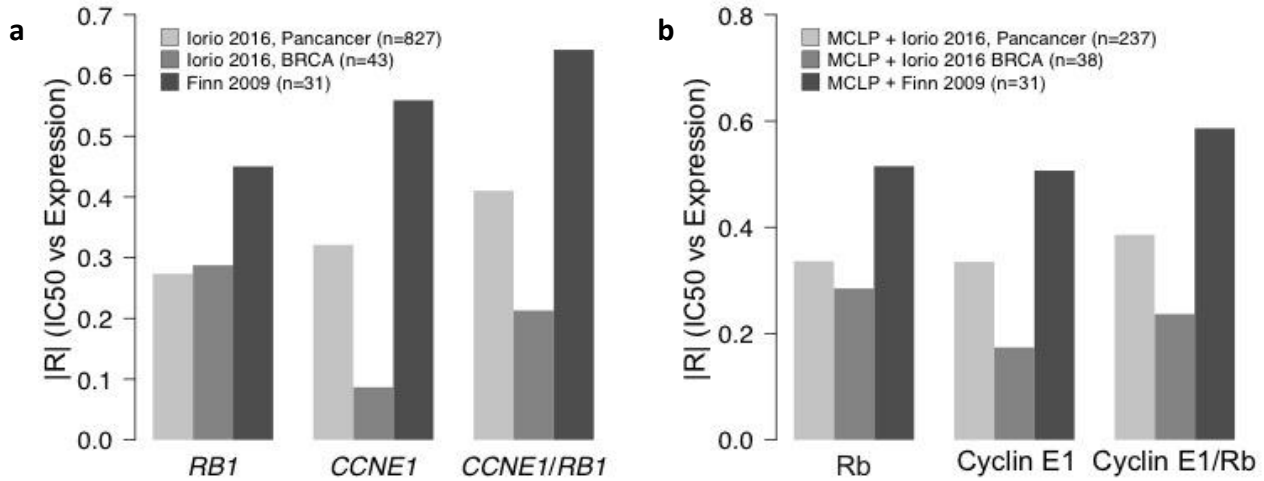

**Supplementary Figure s6.** a) Bar plot of the absolute value of Pearson's correlation coefficient of IC50 values versus protein expression of *RB1*, *CCNE1* and *CCNE1/RB1* by considering both IC50 values and expression data for 827 cell lines of different tumors from Iorio *et al.*, 2016<sup>12</sup> (light grey); both IC50 values and expression data for 43 breast cancer cell lines from Iorio *et al.*, 2016<sup>12</sup> (middle grey); IC50 values and expression data for 31 breast cancer cell lines from Iorio *et al.*, 2016<sup>12</sup> and Finn *et al.*, 2009<sup>14</sup>, respectively (dark grey). b) Bar plot of the absolute value of Pearson's correlation coefficient of IC50 values versus expression of Rb, Cyclin E1 and Cyclin E1/Rb by considering IC50 values and protein expression data for 237 cell lines of different tumors from Iorio *et al.*, 2016<sup>12</sup> and MCLP<sup>13</sup>, respectively (light grey); IC50 values and protein expression data for 38 breast cancer cell lines from Iorio *et al.*, 2016<sup>12</sup> and MCLP<sup>13</sup>, respectively (middle grey); IC50 values and protein expression data for 31 breast cancer cell lines from Finn *et al.*, 2009<sup>14</sup> and MCLP<sup>13</sup>, respectively (dark grey).

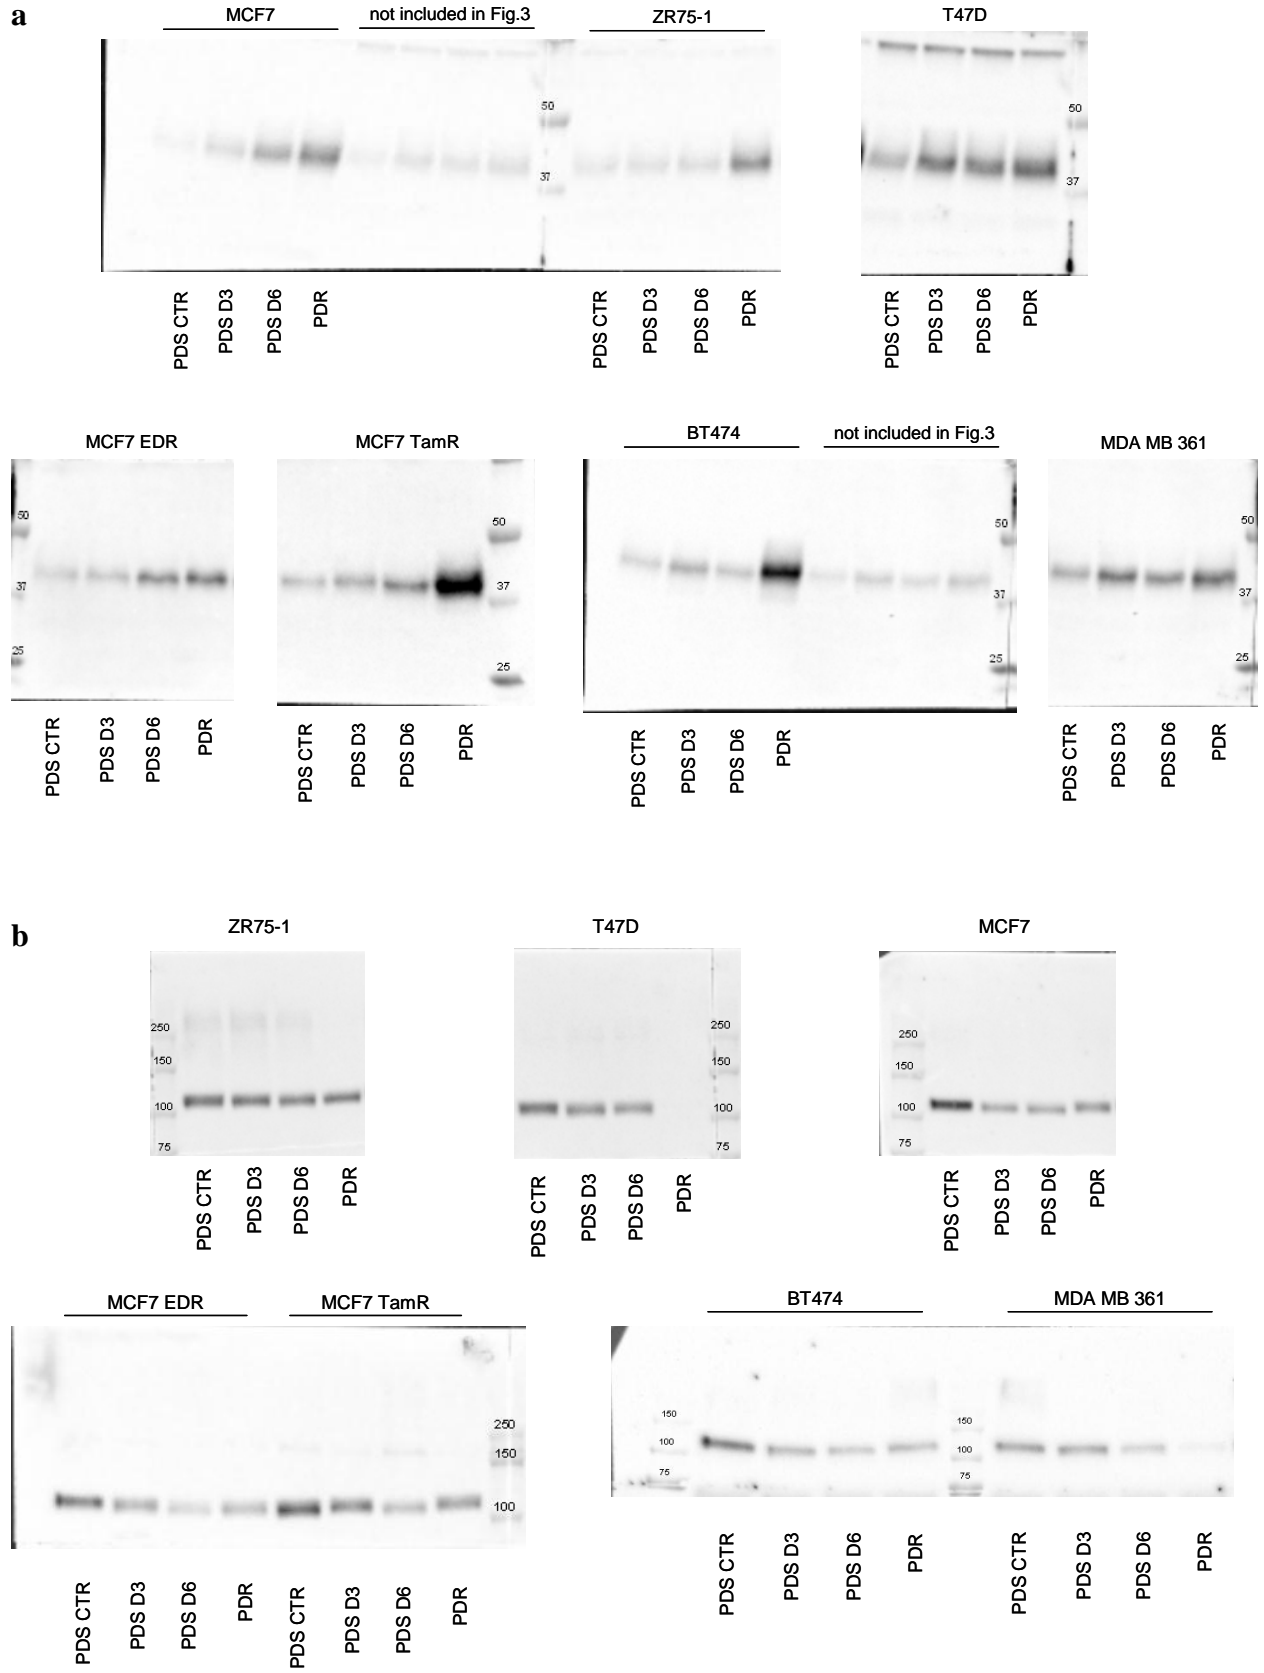

**Supplementary Figure s7.** Uncropped scans of cyclin E1 (a) and Rb (b) blots

**Supplementary Table s1:** IC50 values of PDS and PDR models. IC50 values were assessed after 9 days by methylene blue assay. Mean value of IC50 of three independent experiments +/- standard error (SE) was calculated (P-values <0.05, by Student's t test, were considered significant).

|               | IC50 PDS (SE) [nM] | IC50 PDR (SE) [nM] | IC50 PDR/IC50 PDS | IC50 PDR/IC50 PDS P-value |
|---------------|--------------------|--------------------|-------------------|---------------------------|
| T47D          | 180.6 (13.5)       | 5766.2 (30.6)      | 31.9              | 0.000                     |
| ZR75-1        | 78.3 (10.1)        | 1429.0 (131.1)     | 18.3              | 0.009                     |
| MCF7          | 670.2 (79.7)       | 4112.8 (784.3)     | 6.1               | 0.048                     |
| MCF7 EDR      | 18.1 (3.7)         | 580.4 (102.0)      | 32.1              | 0.031                     |
| MCF7 TamR     | 309.5 (44.6)       | 5001.2 (112.5)     | 16.2              | 0.001                     |
| BT474         | 174.7 (26.3)       | 3073.2 (242.5)     | 17.6              | 0.007                     |
| MDA MB<br>361 | 216.2 (31.2)       | 2653.2 (293.0)     | 12.3              | 0.014                     |
| CAMA1         | 101.0 (28.5)       | NA                 | NA                | NA                        |



**Supplementary Table s2:** Normalized expression (FC, see Methods) of the top 100 differentially expressed genes for PDS treated and PDR cell lines. Columns 2 and 3 report averaged (i.e., by mean) FC values. Differential expression between PDS treated and PDR cell lines is calculated by Wilcoxon-Mann-Whitney test (column 4). Resulting p-values are adjusted by Benjamini Hochberg correction (column 5).

| GeneID (HGNC) | PDS treated (FC) | PDR (FC)     | P-value PDR vs PDS treated (WMW) | Adj P-value (FDR) |
|---------------|------------------|--------------|----------------------------------|-------------------|
| LOC645411     | -0,110083652     | 0,21532616   | 1,25E-05                         | 0,302242237       |
| FPR1          | -0,23060604      | 0,10827435   | 7,51E-05                         | 0,90672671        |
| CNTNAP2       | -0,19271208      | -1,073305596 | 0,000118835                      | 0,957100416       |
| FOS           | 0,243863753      | -0,597847134 | 0,000187635                      | 1                 |
| CCNE1         | -0,206864622     | 1,073067251  | 0,000281452                      | 1                 |
| SYCE2         | -0,439702695     | -0,007074492 | 0,000281452                      | 1                 |
| EFNB2         | 0,216479809      | -0,714866509 | 0,000419051                      | 1                 |
| ELF1          | 0,1996513        | -0,303259103 | 0,000419051                      | 1                 |
| HS.335413     | 0,028845452      | 0,369625895  | 0,000600432                      | 1                 |
| JAG2          | -0,132061152     | 0,288982933  | 0,000600432                      | 1                 |
| TOB2          | 0,087238226      | 0,389363543  | 0,000600432                      | 1                 |
| LOC401074     | 0,035871249      | -0,403548612 | 0,000850611                      | 1                 |
| UTP14C        | 0,146617934      | -0,27379496  | 0,000850611                      | 1                 |
| MRPL37        | -0,257050105     | -0,094243669 | 0,001175845                      | 1                 |
| MTIF3         | 0,148457856      | -0,179777014 | 0,001175845                      | 1                 |
| MUTED         | 0,145058856      | -0,125525875 | 0,00161366                       | 1                 |
| PAM           | 0,426600634      | -0,152727975 | 0,00161366                       | 1                 |
| SLC44A3       | 0,354837442      | -0,011074872 | 0,00161366                       | 1                 |
| WBP11P1       | 0,159173042      | -0,060948698 | 0,00161366                       | 1                 |
| CD58          | 0,101009028      | -0,34012774  | 0,00217031                       | 1                 |
| DHRS7         | 0,286372012      | -0,06211949  | 0,00217031                       | 1                 |
| GLT25D1       | -0,150749421     | 0,182148104  | 0,00217031                       | 1                 |
| LOC646223     | 0,02217994       | -0,321545645 | 0,00217031                       | 1                 |
| LOC646358     | 0,086064327      | -0,229496171 | 0,00217031                       | 1                 |
| RPAIN         | -0,166256313     | 0,028027778  | 0,00217031                       | 1                 |
| TBL1X         | -0,03114284      | -0,290368787 | 0,00217031                       | 1                 |
| ZNF274        | -0,137263148     | 0,117572506  | 0,00217031                       | 1                 |
| ATP7B         | 0,209383044      | -0,348126158 | 0,002895831                      | 1                 |
| C10RF27       | 0,200062836      | -0,085729713 | 0,002895831                      | 1                 |
| COQ10A        | -0,155120037     | 0,278661382  | 0,002895831                      | 1                 |
| N6AMT2        | 0,145846053      | -0,17789196  | 0,002895831                      | 1                 |
| NDRG4         | 0,068042824      | 0,324150284  | 0,002895831                      | 1                 |
| DHODH         | -0,183774849     | 0,081362269  | 0,003713278                      | 1                 |
| BAZ2B         | 0,178258073      | -0,065866732 | 0,003802733                      | 1                 |
| C16ORF38      | 0,290284736      | -0,016237359 | 0,003802733                      | 1                 |
| CAP2          | 0,272511767      | -0,222774758 | 0,003802733                      | 1                 |
| CCNA1         | 0,181125585      | -0,198687909 | 0,003802733                      | 1                 |
| CCNDBP1       | 0,33262544       | -0,069143591 | 0,003802733                      | 1                 |
| DHDH          | -0,196398612     | 0,134514237  | 0,003802733                      | 1                 |
| DNAJC12       | 0,427118157      | -0,000914239 | 0,003802733                      | 1                 |

|              |              |              |             |   |
|--------------|--------------|--------------|-------------|---|
| LOC645018    | -0,285789064 | 0,074474228  | 0,003802733 | 1 |
| MAST4        | -0,2606596   | 0,175404124  | 0,003802733 | 1 |
| NAT6         | -0,156234618 | 0,101242918  | 0,003802733 | 1 |
| NRCAM        | 0,064529211  | -0,461146289 | 0,003802733 | 1 |
| CRELD1       | 0,40867371   | 0,14679551   | 0,00495356  | 1 |
| CXCL12       | 0,372685386  | -0,348401384 | 0,00495356  | 1 |
| CXORF26      | 0,1389814    | -0,087579432 | 0,00495356  | 1 |
| CYP2D7P1     | 0,075643719  | -0,080779408 | 0,00495356  | 1 |
| DSE          | 0,131450304  | -0,273675209 | 0,00495356  | 1 |
| DYNLL2       | -0,191684851 | 0,071249835  | 0,00495356  | 1 |
| ERRFI1       | 0,296544557  | -0,050562421 | 0,00495356  | 1 |
| F8A2         | -0,060096157 | -0,368636667 | 0,00495356  | 1 |
| HMGCS2       | 0,898669527  | -0,200977899 | 0,00495356  | 1 |
| IKZF4        | -0,043543007 | 0,185814257  | 0,00495356  | 1 |
| LOC100133489 | -0,141261656 | 0,155419833  | 0,00495356  | 1 |
| MPPED2       | 0,126355766  | -0,368479988 | 0,00495356  | 1 |
| NFKB1        | 0,074306206  | -0,233144083 | 0,00495356  | 1 |
| POLR2F       | -0,30245563  | 0,035829904  | 0,00495356  | 1 |
| RAB20        | 0,244550809  | -0,091427026 | 0,00495356  | 1 |
| RAB7A        | 0,200049299  | -0,006506248 | 0,00495356  | 1 |
| RDBP         | -0,22057093  | 0,137403184  | 0,00495356  | 1 |
| SAMD4B       | -0,063063188 | 0,137098774  | 0,00495356  | 1 |
| UBA6         | 0,082164351  | -0,202367235 | 0,00495356  | 1 |
| ARPC4        | 0,067217198  | -0,090379758 | 0,006367076 | 1 |
| C6ORF173     | -0,760443889 | -0,034238186 | 0,006367076 | 1 |
| C8ORF51      | 0,030977767  | 0,283991824  | 0,006367076 | 1 |
| CLDN4        | -0,014521548 | 0,3306664    | 0,006367076 | 1 |
| CREB5        | 0,198764684  | -0,118410946 | 0,006367076 | 1 |
| DEPDC1B      | -0,643640868 | -0,189350356 | 0,006367076 | 1 |
| GPR98        | -0,067179155 | -0,398581397 | 0,006367076 | 1 |
| LOC100131187 | 0,203005431  | -0,087315038 | 0,006367076 | 1 |
| LOC100134370 | 0,274472143  | -0,24252304  | 0,006367076 | 1 |
| LOC731049    | -0,905534399 | -0,14957954  | 0,006367076 | 1 |
| MAPK12       | -0,124432332 | 0,306733884  | 0,006367076 | 1 |
| POLR2H       | -0,173800303 | 0,01368544   | 0,006367076 | 1 |
| RAD54B       | -0,463291261 | -0,03537668  | 0,006367076 | 1 |
| RARRES3      | -0,094438764 | 0,558895626  | 0,006367076 | 1 |
| RDM1         | -0,058209154 | 0,158044825  | 0,006367076 | 1 |
| RPS6KA2      | 0,384357211  | -0,024420578 | 0,006367076 | 1 |
| SETBP1       | 0,053243649  | -0,257669907 | 0,006367076 | 1 |
| SPOCD1       | 0,38903287   | -0,048784508 | 0,006367076 | 1 |
| STAT6        | 0,261560997  | 0,071226029  | 0,006367076 | 1 |
| TTK          | -0,837477834 | -0,075720263 | 0,006367076 | 1 |
| VARS         | 0,147704938  | -0,042794633 | 0,006367076 | 1 |
| ZNF789       | -0,075540639 | 0,20506801   | 0,006367076 | 1 |
| ASAH1        | 0,105646451  | -0,083133756 | 0,00812459  | 1 |
| BMI1         | -0,087853771 | -0,360512386 | 0,00812459  | 1 |
| C12ORF24     | -0,179408237 | 0,232263162  | 0,00812459  | 1 |

|              |              |              |            |   |
|--------------|--------------|--------------|------------|---|
| C6ORF1       | 0,179589247  | 0,040074171  | 0,00812459 | 1 |
| CCNL1        | 0,153333764  | -0,089016073 | 0,00812459 | 1 |
| CGGBP1       | -0,014048652 | -0,318930478 | 0,00812459 | 1 |
| FAHD2B       | 0,176107377  | 0,437570788  | 0,00812459 | 1 |
| FAM5C        | 0,167786417  | -0,489243505 | 0,00812459 | 1 |
| FMO5         | 0,349333081  | 0,013545757  | 0,00812459 | 1 |
| HS.127242    | -0,019305103 | 0,170883787  | 0,00812459 | 1 |
| HS.290694    | -0,086962278 | 0,136011899  | 0,00812459 | 1 |
| HS.541226    | -0,317506153 | 0,076922138  | 0,00812459 | 1 |
| ITM2B        | 0,189482934  | -0,191279326 | 0,00812459 | 1 |
| LOC100129268 | -0,135632017 | 0,042684121  | 0,00812459 | 1 |

**Supplementary Table s3:** Quantification of western blot bands for cyclin E1 and Rb normalized against total proteins

|            | Cyclin E1 |      |      |       |  | Rb   |      |      |      |
|------------|-----------|------|------|-------|--|------|------|------|------|
|            | CTR       | D3   | D6   | PDR   |  | CTR  | D3   | D6   | PDR  |
| T47D       | 1,00      | 1,46 | 1,62 | 2,47  |  | 1,00 | 0,69 | 0,63 | 0,00 |
| ZR75-1     | 1,00      | 1,24 | 1,37 | 6,63  |  | 1,00 | 0,88 | 0,75 | 0,59 |
| MCF7       | 1,00      | 4,91 | 8,14 | 16,23 |  | 1,00 | 0,30 | 0,29 | 0,36 |
| MCF7 EDR   | 1,00      | 1,62 | 3,55 | 5,96  |  | 1,00 | 0,40 | 0,19 | 0,34 |
| MCF7 TamR  | 1,00      | 2,03 | 5,38 | 34,87 |  | 1,00 | 0,76 | 0,25 | 0,68 |
| BT474      | 1,00      | 1,37 | 1,23 | 7,83  |  | 1,00 | 0,38 | 0,26 | 0,38 |
| MDA MB 361 | 1,00      | 1,88 | 1,74 | 3,90  |  | 1,00 | 0,90 | 0,36 | 0,13 |

**Supplementary Table s4:** Primary and secondary antibodies working conditions.

| <b>Antibody</b>              | <b>Clone</b> | <b>Company</b>            | <b>Dilution</b> | <b>Secondary Antibody</b> |
|------------------------------|--------------|---------------------------|-----------------|---------------------------|
| CDK2                         | 78B2         | Cell Signaling Technology | 1/500 o.n.      | anti-R 1/2000 1h          |
| CDK4                         | D9G3E        | Cell Signaling Technology | 1/1000 o.n.     | anti-R 1/2000 1h          |
| Cyclin A1                    | BF683        | Merk Millipore            | 1/1000 o.n.     | anti-M 1/2000 1h          |
| Cyclin D1                    | 92G2         | Cell Signaling Technology | 1/1000 o.n.     | anti-R 1/2000 1h          |
| Cyclin E1                    | HE12         | Cell Signaling Technology | 1/1000 o.n.     | anti-M 1/2000 1h          |
| Cyclin E2                    |              | Cell Signaling Technology | 1/500 o.n.      | anti-R 1/2000 1h          |
| E2F1                         |              | Cell Signaling Technology | 1/1000 o.n.     | anti-R 1/2000 1h          |
| E2F2                         | EPR8622      | Abcam                     | 1/2000 o.n.     | anti-R 1/2000 1h          |
| GAPDH                        | D16H11       | Cell Signaling Technology | 1/10000 1h      | anti-R 1/2000 1h          |
| p107                         | C-18         | Santa Cruz Biotechnology  | 1/1000 1h       | anti-R 1/2000 1h          |
| p130                         | EP2141Y      | Abcam                     | 1/1000 1h       | anti-R 1/2000 1h          |
| p16                          | EP435Y-129R  | Abcam                     | 1/250 o.n.      | anti-R 1/2000 1h          |
| p21                          | 12D1         | Cell Signaling Technology | 1/1000 o.n.     | anti-R 1/2000 1h          |
| p27                          | D69C12       | Cell Signaling Technology | 1/1000 o.n.     | anti-R 1/2000 1h          |
| pRb S807/811                 | D20B12       | Cell Signaling Technology | 1/2000 o.n.     | anti-R 1/2000 1h          |
| Rb                           | 4H1          | Cell Signaling Technology | 1/8000 o.n.     | anti-M 1/5000 1h          |
|                              |              |                           |                 |                           |
| o.n. = 4°C overnight         |              |                           |                 |                           |
| 1h = 1 hour room temperature |              |                           |                 |                           |
| anti-R = anti-rabbit         |              |                           |                 |                           |
| anti-M = anti-mouse          |              |                           |                 |                           |
|                              |              |                           |                 |                           |
